# Supplementary material for: Lesion Location-Based Prediction of Visual Field Improvement after Cerebral Infarction
Source: PLoS One. 2015 Nov 25;10(11):e0143882. doi: 10.1371/journal.pone.0143882 (PMC4659640; doi:10.1371/journal.pone.0143882)
Supplement: S1 Data — (XLSX) [file pone.0143882.s001.xlsx]

## Sheet: SubjectDemo
	Defective Quadrant Fields (L: Left, R: Right, T: Top, B: Bottom)							Clinical Variables (HTN = Hypertension; DM = Diabates; HL = Hyperlipidemia; SMK = Smoking; Afib = Atrial fibrillation)						Hemi-VFS			Upper-VFS			Lower-VFS			Lesion Volume (native space, cc)	Regional Extent of Ischemic Lesion (rEIL) based on AAL (Inf = inferior; Mid = middle; Sup = superior; Parahippo = parahippocampal; Occi = occipital cortex)
Subject Index	1 (LT)	2 (RT)	3 (LB)	4 (RB)	Infarct hemisphere	MR time from onset (minute)	VFD type	Age range	HTN	DM	HL	SMK	Afib	VFS 1W	VFS 3M	ΔVFS	VFS 1W	VFS 3M	ΔVFS	VFS 1W	VFS 3M	ΔVFS		Lingual	Calcarine	Fusiform	Cuneus	Inf. Occi	Parahippo	Hippocampus	Sup. Occi	Mid. Occi
1		o		o	L	1440	hemi	60-69	yes	yes	yes	no	no	-30.5811	-21.8649	0.285	-30.2162	-30.2162	0	-30.9459	-13.5135	0.5633	37.3522	0.8813	0.4981	0.2689	0.0021	0.5399	0.0477	0.0349	0.0042	0.001
2		o		o	L	160	hemi	70-79	yes	no	no	no	yes	-4.0811	-0.2297	0.9437	-6.5946	-0.1081	0.9836	-1.5676	-0.3514	0.7759	9.36084	0.1952	0	0.1624	0	0.1163	0	0	0	0
3		o		o	L	990	hemi	60-69	yes	no	no	yes	no	-30.2432	-23.5676	0.2207	-30	-29.7568	0.0081	-30.4865	-17.3784	0.43	44.3468	0.3535	0.0054	0.5544	0	0.3114	0.4072	0.4461	0	0.0262
4		o		o	L	355	hemi	60-69	no	no	yes	no	no	-27.5135	-7.0405	0.7441	-29.3514	-9.1892	0.6869	-25.6757	-4.8919	0.8095	26.335	0.2883	0	0.562	0	0.4055	0.1776	0.0571	0	0
5		o		o	L	3282	hemi	60-69	yes	no	no	yes	no	-30.6351	-27.6351	0.0979	-29.5946	-26.8919	0.0913	-31.6757	-28.3784	0.1041	47.1128	0.7948	0.756	0.5949	0.2949	0.2437	0.4629	0.5465	0.0828	0.01
6		o		o	L	7057	hemi	70-79	yes	no	yes	no	no	-12.4054	-9.7703	0.2124	-11.1351	-4.1892	0.6238	-13.6757	-15.3514	-0.1225	13.1791	0.3857	0.2848	0.0806	0.0007	0.0202	0.0035	0	0	0
7		o		o	L	1423	hemi	50-59	no	yes	yes	yes	no	-29.8649	-29.5541	0.0104	-27.8108	-26.7568	0.0379	-31.9189	-32.3514	-0.0135	13.0717	0.2496	0.3713	0	0.0126	0	0	0	0	0
8		o		o	L	2469	hemi	60-69	no	no	no	no	no	-9.527	-3.7162	0.6099	-9.7297	-3.3784	0.6528	-9.3243	-4.0541	0.5652	11.8891	0.093	0.3052	0	0.2142	0	0	0	0.0248	0
9		o		o	L	182	hemi	70-79	no	yes	no	no	yes	-30.3514	-23.4054	0.2289	-29.6757	-29.3514	0.0109	-31.027	-17.4595	0.4373	25.0936	0.2487	0	0.3229	0	0.001	0.1334	0.0381	0	0
10		o		o	L	5047	hemi	60-69	yes	no	yes	yes	no	-27.6757	-15.4324	0.4424	-26.027	-6.5405	0.7487	-29.3243	-24.3243	0.1705	27.4624	0.1957	0.3847	0.3324	0.5709	0.2417	0.1511	0.0116	0.058	0.0029
11	o		o		L	6749	hemi	70-79	yes	no	no	no	yes	-27.973	-28.6216	-0.0232	-25.2703	-27.3514	-0.0824	-30.6757	-29.8919	0.0256	33.2692	0.4878	0.2128	0.0528	0.0611	0.0475	0.0027	0	0.0481	0.3937
12	o		o		L	941	hemi	60-69	yes	yes	no	yes	yes	-25.6351	-4.973	0.806	-28.8108	-7.1622	0.7514	-22.4595	-2.7838	0.8761	30.908	0.0887	0	0.4234	0	0.5511	0.0018	0	0	0
13	o		o		R	961	hemi	60-69	yes	no	yes	no	yes	-23.4865	-13.5	0.4252	-18.4324	-6.1351	0.6672	-28.5405	-20.8649	0.2689	10.9482	0.0096	0.1999	0	0.3666	0	0	0	0.1571	0.001
14	o		o		R	153	hemi	60-69	no	no	no	yes	no	-30.7297	-30.1892	0.0176	-29.9189	-28.8378	0.0361	-31.5405	-31.5405	0	63.0472	0.44	0.4804	0.4317	0.5765	0.4237	0.3313	0.1205	0.5895	0.3637
15	o		o		R	228	hemi	50-59	yes	yes	yes	no	no	-28.5135	-27.6892	0.0289	-30.4595	-30.8108	-0.0115	-26.5676	-24.5676	0.0753	14.4908	0.3035	0.5035	0.0346	0.0147	0.2012	0	0	0.0007	0
16	o		o		R	1994	hemi	70-79	yes	yes	yes	no	no	-28.7027	-30.1892	-0.0518	-27.8919	-29.0541	-0.0417	-29.5135	-31.3243	-0.0614	37.384	0.4948	0.7732	0.1458	0.3434	0.2093	0	0	0.0106	0.001
17	o		o		R	1184	hemi	60-69	no	no	no	yes	no	-30.8243	-30.8243	0	-30.0811	-30.027	0.0018	-31.5676	-31.6216	-0.0017	61.2898	0.8761	0.4675	0.6493	0.5478	0.3771	0.3781	0.5391	0.1861	0.0038
18	o		o		R	1440	hemi	20-29	no	no	no	no	no	-31.9189	-30.7568	0.0364	-32.6757	-33.1081	-0.0132	-31.1622	-28.4054	0.0885	22.7761	0.2439	0.7227	0.0651	0.6426	0	0.0371	0	0.2406	0.0124
19	o		o		R	720	hemi	60-69	yes	no	no	yes	no	-31.2297	-31.0676	0.0052	-30.4595	-30.4324	0.0009	-32	-31.7027	0.0093	31.189	0.6391	0.3837	0.3308	0.1938	0.1537	0.1511	0.1268	0.0347	0.0043
20		o		o	R	4320	hemi	40-49	yes	yes	yes	no	no	-23.7703	-9.8784	0.5844	-16.8919	-5.1622	0.6944	-30.6486	-14.5946	0.5238	32.9755	0.0009	0.0156	0.002	0.0316	0.0263	0	0	0.5315	0.7054
21		o		o	R	6200	hemi	70-79	no	no	no	yes	no	-25.8243	-7.2162	0.7206	-22.7568	-3.7297	0.8361	-28.8919	-10.7027	0.6296	14.0042	0.0035	0.0559	0.0032	0.0021	0.0425	0	0	0.0998	0.4647
22	o		o		R	1549	hemi	50-59	yes	yes	yes	yes	no	-29.8378	-30.8243	-0.0331	-30.2432	-30.4595	-0.0071	-29.4324	-31.1892	-0.0597	6.48583	0.1013	0.2176	0.0532	0.1004	0.0051	0.0124	0.0085	0	0
23	o		o		R	3150	hemi	60-69	yes	no	no	no	yes	-29.7703	-22.0405	0.2596	-29.9459	-28.1892	0.0587	-29.5946	-15.8919	0.463	16.2277	0.2404	0.0005	0.2073	0	0	0.2032	0.166	0	0
24	o		o		L	1301	hemi	70-79	yes	no	no	no	no	-30.0811	-20.5135	0.3181	-29.4595	-11.9189	0.5954	-30.7027	-29.1081	0.0519	9.75323	0	0.0021	0	0	0	0.0221	0.1459	0	0
25	o		o		L	41	hemi	50-59	no	no	no	yes	no	-28.3919	-31.7703	-0.119	-27.7568	-31.027	-0.1178	-29.027	-32.5135	-0.1201	22.2701	0.5352	0.1365	0.3034	0.0049	0.0061	0.1899	0.1543	0.0007	0
26	o		o		L	2880	hemi	40-49	yes	yes	yes	yes	no	-32.0405	-30.6757	0.0426	-31.5135	-29.8108	0.054	-32.5676	-31.5405	0.0315	93.8193	0.8361	0.9785	0.3697	0.7584	0.093	0.2747	0.1734	0.3659	0.0281
27				o	L	512	lower	40-49	no	yes	yes	yes	no	-17.1757	-16.2568	0.0535				-29.973	-26.3514	0.1208	8.64409	0.0226	0.2499	0	0.2746	0	0	0	0.0283	0
28				o	L	2606	lower	50-59	yes	no	yes	yes	no	-14.6081	-7.7162	0.4718				-25.0541	-14.9189	0.4045	4.86755	0.0026	0.1924	0	0.1461	0	0	0	0	0
29			o		R	6330	lower	60-69	yes	yes	yes	no	no	-16.7297	-11.3243	0.3231				-25.3243	-14.4054	0.4312	3.18358	0.0148	0.1016	0	0.0646	0.003	0	0	0.041	0.0005
30		o			R	164	upper	40-49	yes	no	no	yes	yes	-17	-9.1081	0.4642	-27.5405	-17.6216	0.3602				54.9046	0.3522	0.0274	0.6442	0	0.5713	0.258	0.0507	0	0
31	o				L	489	upper	60-69	no	no	no	no	no	-17.1486	-15.1757	0.1151	-28.7027	-25.6486	0.1064				31.8632	0.7048	0.1956	0.4269	0.0014	0.1082	0.1917	0.2209	0.0042	0.0052
32	o				R	2880	upper	70-79	yes	no	no	no	no	-18.8108	-13.9459	0.2586	-29.4865	-23.4054	0.2062				8.23042	0.3613	0	0.0977	0	0.0263	0.0707	0.0592	0	0
33		o			R	229	upper	50-59	yes	yes	yes	no	no	-19.0541	-13	0.3177	-31.1622	-25.5676	0.1795				30.4561	0.3909	0.043	0.1581	0	0	0.0115	0	0	0
34		o			R	7793	upper	70-79	yes	no	no	no	yes	-21.1486	-20.1892	0.0454	-29.1081	-29.4324	-0.0111				23.1781	0.7439	0.1666	0.137	0	0.09	0.0274	0.0021	0.0057	0.0005
35		o			R	1142	upper	50-59	yes	yes	no	yes	no	-20.3649	-12.1757	0.4021	-29.4324	-21.5405	0.2681				5.06168	0.1217	0	0.0814	0	0.003	0.0327	0.0011	0	0
